# Supplementary material for: Natural abundance high field 43Ca solid state NMR in cement science
Source: Royal Society of Chemistry journal article supplement (doi:10.1039/c000353k), 2010-01-01
Supplement: c000353k.pdf [file c000353k.pdf]

Supplementary Material for PCCP  
This journal is © The Owner Societies 2010

## **Supporting information for manuscript**

*Natural abundance high field  $^{43}\text{Ca}$  solid state NMR in cement science*

**by Igor L. Moudrakovski, Rouhollah Alizadeh and James J. Beaudoin**

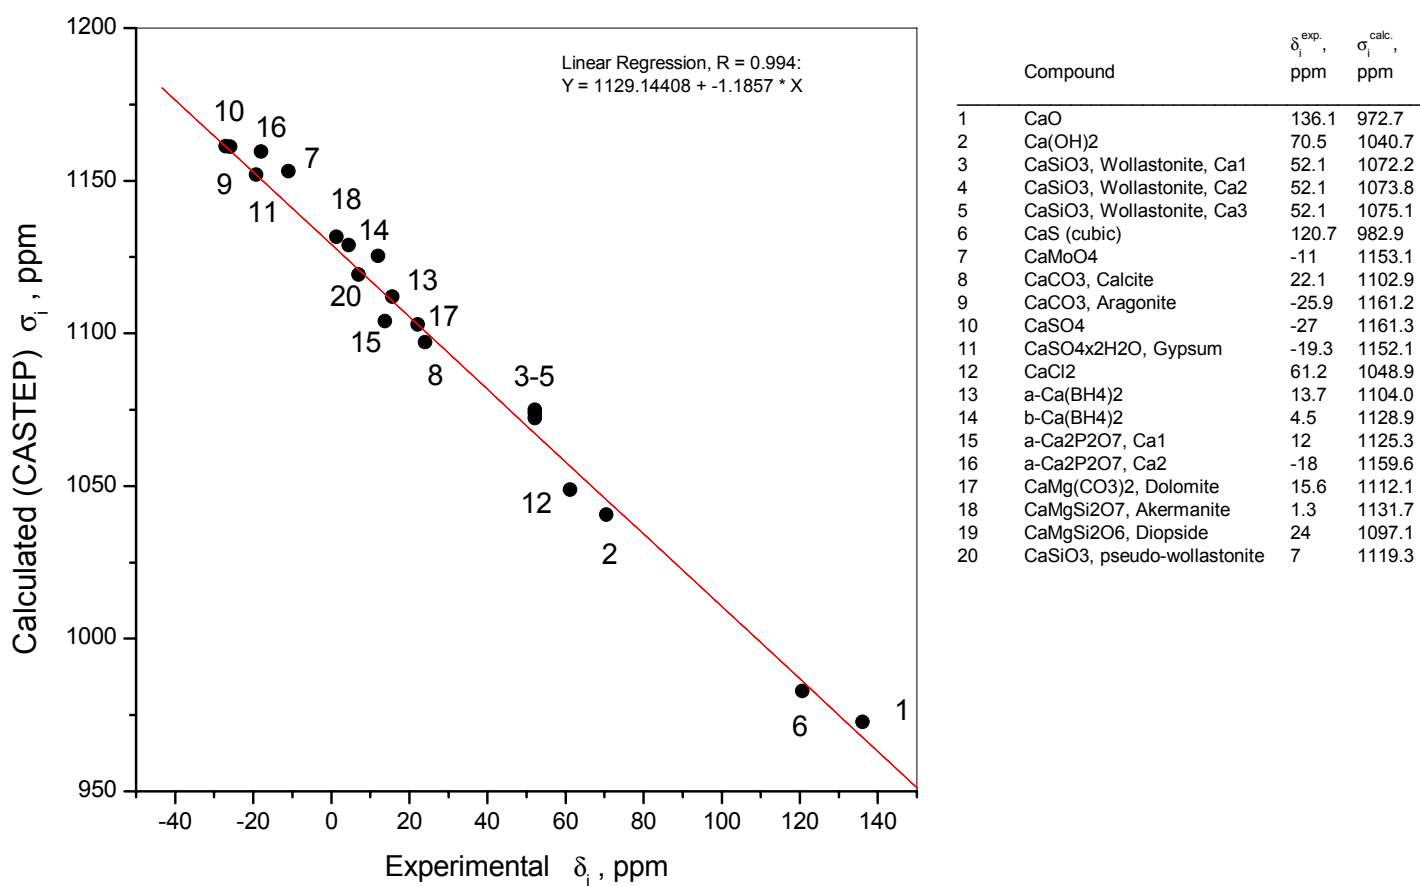

**Figure S1:** Correlation between calculated isotropic shieldings and experimental  $^{43}\text{Ca}$  isotropic chemical shifts in diamagnetic compounds of calcium. All experimental data except for  $\text{CaCl}_2$  were obtained at 21.1T. The chemical for  $\text{CaCl}_2$  is taken from Ref. 29 and corrected for the difference in the references.

**Table S1.** CASTEP calculated  $^{43}\text{Ca}$  NMR parameters in triclinic  $\text{C}_3\text{S}$ .

| Ca site <sup>1</sup> | $\sigma_i$ , ppm | $C_q$ , MHz | $\eta$ | $\delta_i^{\text{Calc. } 2}$ , ppm |
|----------------------|------------------|-------------|--------|------------------------------------|
| 1                    | 969.14           | 7.2         | 0.39   | 134.9                              |
| 2                    | 1039.49          | 5.3         | 0.23   | 75.6                               |
| 3                    | 1019.5           | -3.9        | 0.75   | 92.5                               |
| 4                    | 1005.13          | 3.8         | 0.59   | 104.6                              |
| 5                    | 1028.49          | 4.5         | 0.71   | 84.9                               |
| 6                    | 1028.47          | -3.4        | 0.92   | 84.9                               |
| 7                    | 1017.15          | 2.2         | 0.82   | 94.5                               |
| 8                    | 1016.3           | -2.6        | 0.42   | 95.2                               |
| 9                    | 1019.54          | -3.8        | 0.89   | 92.4                               |
| 10                   | 1031.41          | -3.1        | 0.10   | 82.4                               |
| 11                   | 1018.8           | -3.3        | 0.29   | 93.1                               |
| 12                   | 1018.04          | -2.5        | 0.95   | 93.7                               |
| 13                   | 1042.42          | -3.9        | 0.51   | 73.1                               |
| 14                   | 1033.41          | 4.3         | 0.84   | 80.7                               |
| 15                   | 1023.43          | -2.1        | 0.21   | 89.2                               |
| 16                   | 982.45           | -31.9       | 0.02   | 123.7                              |
| 17                   | 1040.84          | -3.1        | 0.61   | 74.5                               |
| 18                   | 1017.29          | -2.2        | 0.49   | 94.3                               |
| 19                   | 1013.39          | 1.2         | 0.72   | 97.6                               |
| 20                   | 1027.19          | 2.7         | 0.22   | 86.0                               |
| 21                   | 963.78           | -2.9        | 0.35   | 139.5                              |
| 22                   | 1075.6           | -2.4        | 0.23   | 45.2                               |
| 23                   | 955.56           | -3.4        | 0.17   | 146.4                              |
| 24                   | 1009.16          | -1.9        | 0.19   | 101.2                              |
| 25                   | 1010.32          | -3.5        | 0.63   | 100.2                              |
| 26                   | 1020.14          | 4.6         | 0.90   | 91.9                               |
| 27                   | 1019.15          | 3.4         | 0.67   | 92.8                               |
| 28                   | 1004.67          | 4.6         | 0.85   | 105.0                              |
| 29                   | 978.88           | -5.1        | 0.69   | 126.7                              |

<sup>1</sup> A structure from Ref. 46 was used in calculations. Sites numbering follows the original reference.

<sup>2</sup>  $\delta_i^{\text{Calc.}}$  are converted from the absolute shielding constants  $s$  using an empirical relationship  $\sigma_i = 1129.1 - 1.1857 * \delta_i$  (see Fig. S1).
